## 1 **Methanotrophic Community Detected by DNA-SIP at Bertioga's Mangrove Area, Southeast Brazil**

2  
3 Débora do Carmo Linhares, Flávia Talarico Saia, Rubens Tadeu Delgado Duarte, Cristina Rossi Nakayama, Itamar  
4 Soares de Melo, Vivian Helena Pellizari.

### 6 **Abstract**

7 Methanotrophic bacteria can use methane as sole carbon and energy source. Its importance in the environment is  
8 related to the mitigation of methane emissions from soil and water to the atmosphere. Brazilian mangroves are  
9 highly productive, have potential to methane production, and it is inferred that methanotrophic community is of  
10 great importance for this ecosystem. The scope of this study was to investigate the functional and taxonomic  
11 diversity of methanotrophic bacteria present in the anthropogenic impacted sediments from Bertioga's mangrove  
12 (SP, Brazil). Sediment sample was cultivated with methane and the microbiota actively involved in methane  
13 oxidation was identified by DNA-based stable isotope probing (DNA-SIP) using methane as a labeled substrate.  
14 After 4 days of incubation and consumption of 0.7 mmol of methane, the most active microorganisms were related  
15 to methanotrophs *Methylomonas* and *Methylobacter* as well as to methylotrophic *Methylotenera*, indicating a  
16 possible association of these bacterial groups within a methane derived food chain in the Bertioga mangrove. The  
17 abundance of genera *Methylomonas*, able to couple methane oxidation to nitrate reduction, may indicate that under  
18 low dissolved oxygen tensions some aerobic methanotrophs could shift to intraerobic methane oxidation to avoid  
19 oxygen starvation.

21 **Keywords:** DNA-SIP, oxidation of methane, mangrove, *pmoA* methanotrophic bacteria, methylotrophic bacteria

### 23 **Acknowledgments**

24 We thank the research team from USP and EMBRAPA, Rosa Gamba and Dr. Armando C. F. Dias for their  
25 scientific, logistic and sampling support.

### 27 **Funding**

28 This study was funded by the São Paulo Research Foundation (FAPESP), Grant number:04/13910-6. DCL thanks  
29 the MSc scholarship financed by FAPESP, Grant number 2009/06601-0.

### 31 **Author information**

#### 32 **Affiliations**

33 Department of Biological Oceanography, Oceanographic Institute, University of Sao Paulo, Praça do  
34 Oceanográfico, 191, 05508-120 - Butantã, São Paulo - SP, Brazil  
35 Débora do Carmo Linhares (deboraclinhares@gmail.com), Vivian Helena Pellizari (vivianp@usp.br)

36  
37 \* Laboratory of Industrial Biotechnology, Institute for Technological Research of São Paulo, 05508-901, São Paulo,  
38 SP, Brazil

39 Débora do Carmo Linhares (dlinhares@ipt.br)

40  
41 Institute of Marine Sciences, Federal University of São Paulo, Av. Dr. Carvalho de Mendonça, 144, Encruzilhada,  
42 11070-102, Santos, SP, Brazil.

43 Flávia Talarico Saia (ftsaia@yahoo.com.br)

44  
45 Laboratory of Molecular Ecology and Extremophiles, Department of Microbiology, Immunology and Parasitology,  
46 Federal University of Santa Catarina, 88040-900, Florianópolis, SC, Brazil

47 Rubens Tadeu Delgado Duarte (rubens.duarte@ufsc.br)

48  
49 Institute of Environmental, Chemical and Pharmaceutical Sciences, Federal University of São Paulo, Rua São  
50 Nicolau, 210, 09913-030, Diadema, SP, Brazil.

51 Cristina Rossi Nakayama (crnakayama@unifesp.br)

52  
53 Environmental Microbiology Lab. EMBRAPA Environment, Rodovia SP, Km 12,5.13918-110 Jaguariúna, SP,  
54 Brazil.

55 Itamar Soares de Melo (itamar.melo@embrapa.br)

56  
57 \*Recent address

### 59 **Corresponding author**

60 Correspondence to Dra Débora do Carmo Linhares, deboraclinhares@gmail.com or Dra. Vivian Helena Pellizari,  
61 vivianp@usp.br

### 63 **Ethics declarations**

64 Conflict of Interest  
65 The authors declare no conflict of interest.

66  
67 **ORCID number**

68 0000-0002-9055-9187 - Débora do Carmo Linhares  
69 0000-0002-9199-077X - Flávia Talarico Saia  
70 0000-0002-9939-3400 - Rubens Tadeu Delgado Duarte  
71 0000-0001-9428-585X - Cristina Rossi Nakayama  
72 0000-0003-2785-6725 - Itamar Soares de Melo  
73 0000-0003-2757-6352 - Vivian Helena Pellizari  
74

75 **Introduction**

76 Mangroves are tropical and subtropical ecosystems in the transition between land and marine  
77 environments. Subjected to tidal periodical flooding, mangroves present variable salinity, are muddy, oxygen poor  
78 and rich in nutrients and organic matter [1–3]. The environmental variability in mangroves sustains a highly active  
79 microbiota, which plays a central role in biogeochemical cycles, soil structure generation and decomposition, and  
80 influences the primary production and plant community dynamics [1, 2].

81 Even though coastal marsh ecosystems are considered net sinks for carbon sequestration, spatial and  
82 temporal gradients promote a wide range of biogeochemical and anaerobic conditions, making them important  
83 sources of greenhouse gases to the atmosphere [4]. The prevalence of anaerobic conditions partnered with the high  
84 organic matter content favors methanogenesis by archaea. Methane generation is in part regulated by competition  
85 with sulfate reducing bacteria in periods of higher sulfate concentration, but methanotrophic bacteria and archaea  
86 have also a central role in reducing the total net flux of methane to the atmosphere as they are responsible for the  
87 oxidation of a significant amount of the gas produced in mangroves [5, 6]. Although anaerobic methanotrophy  
88 occurs in mangroves, coupled to sulfate, nitrate or nitrite reduction [7], the consumption of methane by aerobic  
89 bacteria is also an important process taking place in the thin oxic layer at the sediment – water interface, submerged  
90 leaf sheaths, or associated to plant roots and rhizosphere [1, 8]. Methanotrophic bacteria may also benefit from the  
91 interaction with fungi, who produce hydrophobic proteins to reduce surface tension on the hyphae, facilitating the  
92 access to hydrophobic gases such as methane [9].

93 Aerobic methanotrophic bacteria form a group physiologically unique and distinctive for its ability to use  
94 methane as a sole source of carbon and energy [10]. Besides their importance in the global cycle of methane and  
95 nitrogen, methanotrophic bacteria has potential application in several biotechnological processes, such as  
96 remediation of chlorinated solvents, production of polyhydroxyalcanoates (PHA), denitrification, and demethylation  
97 of methyl mercury [11], even in adverse oxygen concentrations [12].

98 Methanotrophic bacteria were originally grouped into Type I, II and X according to phylogeny, cellular  
99 ultrastructure, metabolic pathways, and ability to fix nitrogen [5]. As knowledge in aerobic methanotrophic diversity  
100 advanced, grouping criteria were revised. In current classification, according to phylogeny and carbon fixation  
101 pathways, methanotrophic bacteria are divided into Type I (gamma-proteobacteria using the ribulose  
102 monophosphate pathway), Type II (alpha-proteobacteria fixing carbon through the serine pathway) and Type III  
103 (*Methylocidiphilae*, in Phylum Verrucomicrobia, using the Calvin cycle to fix carbon derived of methane oxidation)  
104 groups. Type I methanotrophs were further divided into Types Ia (*Methylococcaceae*), Ib (*Methylococcaceae*,  
105 former Type X), Ic (*Methylotehrmaceae*) and Id (uncultured groups, based on *pmoA* sequences). Type II  
106 methanotrophs were also divided into Type IIa (*Methylocystaceae*) and Type IIb (*Beijerinckiaceae*) subgroups [13,  
107 14].

108 Despite the importance of methanotrophic processes in regulating methane fluxes from coastal marsh  
109 ecosystems, studies of methanotrophic diversity in these environments are still scarce compared to research in

110 freshwater and upland soils ecosystems. Brazilian mangroves, considered very vulnerable to damage, correspond to  
111 7 to 8.5% of global mangrove areas and it is discontinuously distributed along the Brazilian coast [15]. Previous  
112 studies with Brazilian mangrove samples confirmed the presence of methanogenic archaea and metagenomic  
113 analysis showed sulfur metabolism prevalent in microbiomes of polluted and pristine sites [2, 16, 17]. Mesocosm  
114 experiments detected changes in bacterial communities induced by oil contamination in mangrove sediments from  
115 São Paulo State [18] and reported a preferential enrichment of the aerobic methanotroph Methylococcaeae  
116 sequences in the rhizosphere of *Rhizophora mangle* from Guanabara Bay mangrove, in Rio de Janeiro State [1].  
117 Here we investigate the functional and taxonomic diversity of active methanotrophic bacteria present in oil polluted  
118 mangrove sediment samples from Bertioga (São Paulo State, Brazil), through DNA-SIP followed by the  
119 construction of 16S rRNA gene libraries, which allows studying the role of active cultured and uncultured bacteria  
120 in the oxidation of CH<sub>4</sub>.

121

## 122 **Material and Methods**

### 123 **Sample collection and processing**

124 Surface sediment samples (up to 5 cm below sediment-water interface) were collected from a mangrove  
125 located in Bertioga, São Paulo State, in the southeast region of Brazil, in an area chronically contaminated by oil  
126 spills [2]. Sediments were sampled at 23°53'49''S, 46°12'28''W, from 5 points distanced by 2 to 4 m. Sediment  
127 samples, approximately 500 g, were collected with a sterile stainless steel spatula to the depth, sealed in sterile  
128 plastic bags and transported in a cool box at 4°C. In the laboratory, samples were homogenized and stored at 4°C for  
129 stable isotope probing experiment. Aliquots of 0.25 g of homogenized sediment were immediately stored at -20°C  
130 for molecular analyses. At the moment of sampling, values of water salinity, sediment salinity, pH, temperature,  
131 conductivity, and dissolved oxygen were 1.74‰, 0.48‰, 6.58, 22.6°C, 8.84 μS.cm<sup>-1</sup> and 0.0 mg.L<sup>-1</sup>, respectively.

132

### 133 **Stable isotope probing microcosms**

134 Five grams of homogenized sediment samples (wet weight) were incubated in 100 mL glass bottles filled  
135 with 40 mL of NMS medium (ATCC 1306), with salinity of 1.13‰ adjusted with synthetic reconstituted sea water  
136 (S9883, Merck, Germany), and sealed with butyl rubber stoppers and aluminum crimp caps. <sup>13</sup>C-methane (99% <sup>13</sup>C,  
137 Cambridge Isotope Laboratories, Andover, USA) or <sup>12</sup>C-methane (Linde, São Paulo, Brazil) was added to a final  
138 methane concentration on headspace of 8% (v/v) under sterile conditions, using sterile 0.2 μm hydrophobic PTFE  
139 syringe filters. Controls, without methane, were also included. Replicate bottles amended with <sup>13</sup>C-methane or <sup>12</sup>C-  
140 methane were incubated at 28°C in the dark at 150 rpm. Methane (99% purity) was supplied to the microcosms  
141 whenever detected consumption was greater than 95%, up to 8 additions. Before each methane addition, the bottles  
142 were flushed with sterile air to reestablish atmospheric conditions. A pair of bottles (<sup>13</sup>C-methane and <sup>12</sup>C-methane)  
143 was subsequently taken for nucleic acid extraction at days 2, 4 and 7, corresponding to methane consumption of 0.2,  
144 0.7 and 1.4 mmol, respectively. Sediment slurry was centrifuged (12.000 x g, 40 min, 4°C) and cells in the pellet  
145 were immediately stored at -20°C.

146

### 147 **DNA extraction and isopycnic centrifugation and fractionation**

148 DNA from the sediment as well as from SIP microcosms were extracted with Power Soil DNA Isolation  
149 Kit (Mo-Bio Laboratories Inc, USA) as described in the manufacturer's protocol. The integrity of DNA was checked  
150 on gel electrophoresis and quantified using a NanoDrop ND1000 Spectrophotometer (Thermo Scientific, USA).

151 Equilibrium (isopycnic) density gradient centrifugation and fractionation were adapted for DNA-SIP from  
152 methods for RNA-SIP [19] using cesium trifluoroacetate (CsTFA) gradients, without addition of formamide and  
153 with a starting buoyant density (BD) of 1.61 g.mL<sup>-1</sup>. Solutions were prepared by mixing 2.0 g.mL<sup>-1</sup> CsTFA stock  
154 solution (Amersham Biosciences) and gradient buffer described in [20]. Gradients were loaded with 10 µL of DNA  
155 (500 ng) and then subject to ultracentrifugation at 64,000 rpm and 20°C for 40 h using the same tubes, rotor and  
156 ultracentrifuge described previously [19]. Gradients were fractionated into 100 µL fractions as described previously  
157 [19]. Twenty fractions were obtained through each fractionation procedure, which were numbered from 1 (heavier)  
158 to 20 (lighter). Buoyant density (BD) of fractions was determined indirectly by measuring refraction index with an  
159 AR200 digital refractometer (Reichert Inc., Depew, NY, USA) of each fraction from blank gradients run in parallel  
160 containing water instead of DNA. Sample DNA was precipitated overnight from fractions with 500 µL cold  
161 isopropanol at -20 °C, followed by centrifugation (14,000 rpm, 30 min, 4°C). Precipitates were washed in 70% cold  
162 ethanol (0.5 mL) and re-eluted in 30 µL elution buffer (10 mM Tris-HCl, 1 mM EDTA, pH 8). Total DNA was  
163 determined using the PicoGreen® ds-DNA Quantitation Kit (Invitrogen), according to the manufacturer's  
164 instructions.

165

### 166 **Denaturing Gradient Gel Electrophoresis**

167 Phylogenetic diversity of the bacterial communities from the sediment and from each fraction of SIP  
168 incubation with <sup>12</sup>CH<sub>4</sub> and <sup>13</sup>CH<sub>4</sub> at the 4<sup>th</sup> day was analysed by denaturing gradient gel electrophoresis (DGGE).  
169 Bacterial 16S rRNA gene fragments were amplified in a PCR from 1 µL extracted DNA with primers GC338F and  
170 518R [21]. PCR program in a Mastercycler Personal-system (Eppendorf, USA) was 94°C for 5 min, 30 cycles 94 °C  
171 for 1 min, 55 °C for 1 min, 72°C for 2 min and a final elongation period of 7 minutes at 72°C. The amplified product  
172 (7 µL) was analysed on an 8% polyacrylamide gel with a 45% - 65% denaturing gradient (where the 100%  
173 denaturant contained 7 M urea and 40% formamide) that was run for 15 hours at 60°C and 100 V in the Ingeny  
174 PhorU2 apparatus (Ingeny International, Goes, The Netherlands). Gel was silver nitrate stained [22] and DGGE  
175 profiles were visualized under white light. Comparisons of DGGE profiles were performed by cluster analysis of the  
176 banding patterns using Bionumeric<sup>TM</sup> software (Applied Maths, NV). Dendrograms were constructed by the  
177 unweighted pair group method with arithmetic mean (UPGMA) groupings with a similarity matrix based on the  
178 Pearson coefficient.

179

### 180 **Clone library and phylogenetic analysis**

181 In order to identify the dominant bacterial species involved in methane oxidation process, 16S rRNA clone  
182 libraries were constructed from total DNA of the sediment (GenBank accession No. MT644161-MT644186) and  
183 from a heavy and a light DNA fractions from <sup>13</sup>CH<sub>4</sub> flask (fractions 12 and 15, respectively) obtained after isopycnic  
184 centrifugation (GenBank accession No. MT603661-MT603717). Clone library of *pmoA* genes of the sediment was  
185 also done (GenBank accession No. MT596824-MT596880).

186 Bacterial 16S rRNA gene fragments were PCR amplified in triplicate from 1 µL of total DNA (50 ng) with  
187 primers 27F [23] and 1401R [24]. The temperature program was 94°C for 5 min, 30 cycles 94°C for 30 seconds,  
188 55°C for 30 seconds, 72°C for 90 seconds and a final elongation time of 7 minutes at 72°C. Fragments of *pmoA*  
189 genes were PCR amplified in triplicate from 1 µL of total DNA (50 ng) with forward primer A189 [25] and reverse  
190 primer MB661 [26]. The temperature program was 94°C for 5 min, 30 cycles 94°C for 30 seconds, 55°C for 30  
191 seconds, 72°C for 90 seconds and a final elongation time of 7 minutes at 72°C. Amplified 16S rRNA and *pmoA*  
192 gene fragments were purified with Pure Link PCR Purification Kit (Invitrogen), cloned into pGEM-T-Easy

193 (Promega - Madison, Wisconsin, USA) according to the manufacturer's protocol and transformed into *E. coli*  
194 JM109 by heat shock (0°/42 °C for 45 seconds). Cloned inserts were amplified with primers M13F and 1401R for  
195 16S rRNA clones, and with primers M13F and M13R for *pmoA* clones. The temperature program for both reactions  
196 was 97°C for 3 min, 40 cycles 94°C for 30 seconds, 60°C for 30 seconds, 72°C for 90 seconds and a final elongation  
197 time of 5 minutes at 72°C. The amplified products were purified with Pure Link PCR Purification Kit (Invitrogen)  
198 and sequenced (MegaBACE 1000 System) with T7 primer.

199 Initially, all 16S rRNA sequences were checked for chimeras on the software Bellerophon [25]. Sequences  
200 considered putative chimeras or shorter than 540 bp were excluded from further analysis. The 16S rRNA clones  
201 were aligned on Mothur v.1.42.0 [26] using the SILVA 138 reference database [27] and the alignment was checked  
202 and manually edited for position corrections using the software ARB [28]. A phylogenetic tree was constructed on  
203 ARB by the maximum likelihood method with a 1,000 bootstrap analysis. Representative reference sequences of the  
204 most closely related members were obtained from the Genbank [29] and Ribosomal Database Project – RDP [30].

205 A similar approach was used for the analysis of *pmoA* clones. The sequence alignment was performed with  
206 the Clustal W [31] within the BioEdit v7.0.9.0 package [32] and the phylogenetic tree was constructed on MEGA 7  
207 [33] using the neighbor-joining method and a 2,000 bootstrap value.

208

## 209 **Chemical analysis**

210 Methane was measured by headspace analysis using a gas chromatograph (HP6850, Agilent) equipped with  
211 a flame ionization detector and a megabore column (HP-PLOT Al<sub>2</sub>O<sub>3</sub> S, 50m\*0.53mm\*0.15µm). The temperature  
212 for column chamber, inlet chamber and detector were 40 °C (isothermal), 150 °C and 220 °C, respectively. High  
213 purity hydrogen was used for carrier gas, at a flow rate of 2.6 mL.min<sup>-1</sup>. The split ratio of gas sample in inlet  
214 chamber was 25:1. The flow rate at the detector was 450mL.min<sup>-1</sup> for air, 45mL.min<sup>-1</sup> for hydrogen and 55 mL.min<sup>-1</sup>  
215 for nitrogen. Methane volume and concentration in microcosms' headspaces was calculated by comparing the areas  
216 of methane peaks obtained from the samples with a standard area, determined by the average of five injections of  
217 99.95% pure methane (standard deviation < 1%). Clapeyron equation was used to calculate methane amounts in  
218 mmols, assuming temperature of 25 °C, atmospheric pressure (1 atm) and the volume corresponding to the total  
219 volume (milliliters) of methane consumed in each period.

220

## 221 **Results and Discussion**

### 222 **Methanotrophs from sediment of Bertioga assessed by *pmoA* clone library**

223 Methanotrophy is an important biological regulator of methane fluxes to the atmosphere. Aerobic processes  
224 were the first to be described. Anaerobic methane oxidation in hypoxic and microoxic natural and artificial  
225 environments [6, 34–36] were later detected, with the use of sulfate, nitrate, nitrite and metals as electron acceptors  
226 [7], showing that methanotrophs are able to occupy a number of diverse niches where methane is present. More  
227 recently, studies have been pointing out to the ability of aerobic methanotrophs to be active in anoxic environments  
228 competing with anaerobic groups [37].

229 A library of *pmoA* gene was carried out as a preliminary attempt to access the methanotrophic diversity in  
230 the mangrove sediment. The phylogenetic tree (Figure 1) reveals that 79% of the clones grouped with the  
231 gammaproteobacterial family *Methylococcaceae*, and the remaining 21% with the family *Methylocystaceae*, both  
232 already reported in anoxic environments [38]. Aerobic methanotrophic gammaproteobacteria are commonly  
233 detected in aquatic environments and in habitats rich in methane and at hypoxic or anaerobic conditions, indicating  
234 that there may be a niche overlap with anaerobic methanotrophs [37]. One example are species from the genus

235 *Methylomonas*, capable of oxygen scavenging under hypoxic environments [37]. This genus was the most  
236 representative in the sediment used as inoculum, being affiliated to 21% of sequences. It has already been reported  
237 in the rhizosphere of Brazilian mangrove roots mesocosms [1]. Abundance of *Methylococcaceae* was also positively  
238 correlated with concentrations of hydrocarbons and negatively with dissolved oxygen in consequence of Deepwater  
239 Horizon disaster [39]. Given the fact that sequences of bacteria related to contaminated areas or able to hydrocarbon  
240 and MTBE degradation were detected in 16S rRNA libraries of the sediment (data not shown) and of SIP  
241 microcosms (Figures 4 and 5), it is possible that exposure of the microbiota to oil spills in the area of study may  
242 have contributed to the higher number of *Methylococcaceae* clones found.

243 There is also a comprehensive cluster whose nearest reference is an uncultured bacterium (FN600101.1)  
244 obtained from the rhizosphere of *Oryza sativa* in a rice field in Italy (unpublished). Indeed, uncultured  
245 methanotrophic groups have been observed in paddy fields in several parts of the world [40]. Moreover, 35% of  
246 sequences grouped with uncultured organisms demonstrating the lack of characterized isolates of the group.

247 In the set of sequences obtained there were not representatives of other groups of methanotrophic bacteria,  
248 such as *Crenothrix polyspora* and those included in the Phylum Verrucomicrobia. However, their presence in the  
249 sediments cannot be excluded, since i) library coverage may not have been complete and ii) these organisms have  
250 an unusual *pmoA* gene, which could only be accessed through the use of modified primers and/or less restrictive  
251 conditions of PCR [41, 42].

252

### 253 **DNA-SIP microcosms**

254 The percentage of methane added to the microcosms was in agreement with other studies, which added 5 to  
255 10% methane at each new supply [43–45]. In our study 0.7 mmol of methane was consumed in 4 days of incubation  
256 which is in agreement with slurries incubated with mineral medium [43] and this strategy is quite valuable to  
257 prevent the cross-feeding, very common especially after longer periods of incubation [44, 45].

258 Isopycnic density gradient centrifugation of DNA extracted from cultures at 2, 4 and 7 days of incubation  
259 (T1, T2 and T3, respectively) showed an unlabeled DNA peak at BD of 1.5383 and 1.5330 (fractions 15-16)  
260 whereas <sup>13</sup>C-DNA occupied fractions ranging in BD from 1.5884 to 1.5620 (fractions 9-12) (Figure2). After 2 days  
261 of incubation, with consumption of 0.2 mmol of methane, no clear shift was obtained (Figure 2 T1). After 4 days of  
262 incubation (Figure 2 T2), DNA from fractions 11-12 was detected in the <sup>13</sup>C-methane microcosm compared to the  
263 <sup>12</sup>C-methane microcosm, showing incorporation of the <sup>13</sup>C into the DNA of microbiota metabolically involved in  
264 methane oxidation. At this time, consumption of 0.7 mmol of methane was detected. After 7 days of incubation  
265 (Figure 2, T3) and 1.4 mmol methane consumption, DNA from the heaviest fractions were also detected in the <sup>13</sup>C-  
266 methane microcosm compared to the <sup>12</sup>C-methane microcosm, as well as DNA from light fractions (13-14). To  
267 minimize the influence of cross-feeding on the results, only DNA samples of the T2 were chosen for further  
268 analyses.

269

### 270 **Microbial community and phylogenetic analysis**

271 PCR-based 16S rRNA gene DGGE analysis was carried out on the <sup>12</sup>C- and <sup>13</sup>C-enriched fractions of the  
272 microcosm after 4 days of incubation (Figure 3). PCR-based 16S rRNA gene DGGE analysis of inoculum as well as  
273 of the DNA not fractionated of the microcosm were also included (Figure 3). In relation to the inoculum (lane t2), it  
274 is possible to notice that after 4 days of incubation an enrichment of microorganisms involved in the metabolism of  
275 methane can be detected, evidenced by a cluster of NF C12 and NF C13 (DNA not fractionated of the flasks  
276 incubated with <sup>12</sup>CH<sub>4</sub> and <sup>13</sup>CH<sub>4</sub>, respectively). Bacteria fingerprints of samples incubated with <sup>13</sup>CH<sub>4</sub> show that

277 fractions 11-12 (T2 13C 11 and 12) formed a cluster with 88 % similarity. These fractions had an increase in DNA  
278 after  $^{13}\text{C}\text{H}_4$  addition, corresponding to the microorganisms that incorporated carbon from  $^{13}\text{C}\text{H}_4$ . Interesting to note  
279 is that light fractions of the flask incubated with  $^{13}\text{C}\text{H}_4$  (T2 13C 13-17) representing microorganisms that did not  
280 incorporated carbon from  $^{13}\text{C}\text{H}_4$ , formed a cluster with 78% similarity with the inoculum.

281 Clone libraries of the 16S rRNA gene were constructed from total DNA extracted from the mangrove  
282 sediment (inoculum), and from the fractions 12 (BD = 1.5620) and 15 (BD = 1.5383) of the  $^{13}\text{C}$ -methane amended  
283 microcosm, corresponding to “inoculum”, “heavy fraction”, and “light fraction” clone libraries, respectively.  
284 Analysis of the sequences against the RDPII database revealed that there was homology with 16S rRNA gene  
285 sequences from mangroves, marine sediments and xenobiotics contaminated sites. Phylum distribution of sequences  
286 in clone libraries from sediment and light fractions were similar, with predominance of Proteobacteria, Chloroflexi,  
287 Bacteroidetes and Actinobacteria (Figure 4). These phyla were also amongst the most abundant groups in Bertioga  
288 mangrove sediments metagenomes [16], corroborating the obtained results in this work of bacterial diversity in the  
289 area of study. On the other hand, as expected, incubation of sediment with methane resulted in the enrichment of the  
290 Proteobacteria phylum, as evidenced by the distribution of sequences in the heavy fraction library.

291 Sequences from light fractions (Figure 5, white circles) were widely distributed into different clades and  
292 mostly associated to chemoheterotrophic bacteria. Representative genera of sulfur (*Marichromatium*), iron  
293 (*Sideroxydans* and *Geobacter*) and manganese (*Caldimonas*) oxidizing bacteria as well as sulfate reducing bacteria  
294 (*Desulfobacterium*) were present. Detection of sequences associated to polyaromatic hydrocarbon degradation  
295 (*Alterythrobacter*, *Methylibium*) or to oil fields (*Defluvimonas*) may also reflect the adaptation of the microbiota to  
296 past oil spills in the area of study. The presence of anaerobic groups is probably associated to bacteria from the  
297 inoculum carried into the culture medium and still present after the short incubation period.

298 Sequences from the heavy fraction (Figure 5, black circles), on the other hand were grouped mainly in  
299 clades associated to methanotrophic (*Methylomonas*, *Methylomicrobium* and *Methylobacter*) and methylotrophic  
300 (*Methylotenera*, *Methyloversatilis*, *Methylophilus* and *Hyphomicrobium*) groups, reflecting the associations of  
301 bacterial groups related to the methane cycle in the Bertioga mangrove sediment and in agreement with a possible  
302 methane derived microbial food chain [37]. The recovery of methylotrophic bacteria sequences in the heavy DNA  
303 fractions, in particular  $\beta$ -Proteobacteria, have also occurred in several studies involving the DNA-SIP technique  
304 [44–47]. Recently, cooperation between *Methylobacter* (*Methylococcaceae*) and *Methylotenera versatili*  
305 (*Methylophilaceae*) on methane oxidation was evidenced in lake Washington sediment fed with  $^{13}\text{C}$ -methane and  
306 incubated under aerobic conditions and with nitrate (10mM) as electron acceptor [48]. A succession of  
307 methanotrophic and methylotrophic metabolisms coupled to denitrification was also described in a membrane  
308 biofilm reactor treating perchlorate and fed with methane as sole electron donor and carbon source [49]. Initially  
309 performing anaerobic methanotrophy coupled to denitrification, the reactor biofilm was gradually dominated by  
310 *Methylocystis* and at final stages, by *Methylomonas* cells. Under low dissolved oxygen tensions, these genera  
311 coupled methane oxidation to nitrate reduction (intraerobic methanotrophy), generating nitrite or nitrous oxide. The  
312 organic compounds derived from methanotrophy, such as methanol, were oxidized by the methylotrophic  
313 denitrifying genera *Methylophilus* and *Methyloversatilis* coupled to nitrate reduction. The authors also hypothesized  
314 that anaerobic methanotrophic microorganisms could benefit from intermediates produced by aerobic  
315 methanotrophs and both metabolisms occurred simultaneously under this methane rich anoxic environment. Similar  
316 associations may be occurring at the sediments of Bertioga mangrove. In our study, *Methylomonas*, *Methylobacter*  
317 and *Methylotenera* genera were dominant in the heavy fraction of DNA-SIP microcosms. NMS medium is rich in  
318 nitrate and, although incubations were carried out under aerobiosis, the concomitant presence of these groups in the

319 microcosms associated to  $^{13}\text{CH}_4$  consumption may indicate that under the anoxic environment of the mangrove  
320 sediment, they could shift to intraerobic methane oxidation. Another example of methylotrophic denitrifying  
321 bacterium commonly associated to methanotrophic bacteria in the heavy fraction sequences was *Hyphomicrobium*  
322 *methylovorum*. The fact that the genus *Methylocystis*, retrieved from sediment in *pmoA* clone libraries, was not  
323 detected in DNA-SIP microcosms may be related to the influence of culture conditions, probably favouring  
324 *Methylomonas* over *Methylocystis* cells.

325 Other clones from the heavy fraction clone library occurred at low frequency (Fig. 5). These clones might  
326 be representatives of: i) bacteria that incorporated heavy carbon through the use of secondary marked substrates  
327 such as methanol and formaldehyde or ii) sequences amplified from light DNA traces [45, 47].

328

## 329 **Conclusion**

330 Our work showed that aerobic bacterial community associated to methane consumption in Bertioga  
331 sediment is diverse and that they may have an important role in reducing methane emissions under aerobic or anoxic  
332 conditions. Both alpha and betaproteobacteria methanotrophs commonly associated to aquatic environments were  
333 represented in *pmoA* clone libraries, with predominance of the Methylococcaceae family, in special *Methylomonas*  
334 and *Methylobacter* genera. Methylocystaceae family was also represented by *Methylocystis* sequences and a clade of  
335 sequences related to an uncultured clone sequence also indicate that other methanotrophic groups are yet to be  
336 identified.

337 DNA-SIP technique, followed by analysis of 16S rRNA gene, was a suitable tool to detect active  
338 microorganisms related to methane oxidation, using microcosms with NMS medium containing nitrate and amended  
339 with methane as sole source of carbon and energy. Sequences from light fractions were broadly distributed into  
340 clades of chemoheterotrophic bacteria, including groups associated to hydrocarbon degradation or to oil fields, as  
341 well as genera related to sulfur, iron and manganese oxidizing and sulfate reducing metabolisms. Microbial groups  
342 involved in  $^{13}\text{CH}_4$  consumption were mostly methanotrophic (*Methylomonas*, *Methylomicrobium* and  
343 *Methylobacter*) and methylotrophic (*Methylotenera*, *Methyloversatilis*, *Methylophilus*, and *Hyphomicrobium*)  
344 bacteria. Their co-occurrence in DNA-SIP microcosms suggests that a microbial methane food chain may be  
345 established in Bertioga sediments and it is possibly able to shift from aerobic methanotrophy to methane oxidation  
346 coupled to nitrate reduction when oxygen concentrations are low.

347

## 348 **Compliance with Ethical Standards**

349 The authors declared that they have no conflicts of interest to this work. We declare that we do not have any  
350 commercial or associative interest that represents a conflict of interest in connection with the work submitted.

351

## 352 **References**

353

- 354 1. Gomes NCM, Cleary DFR, Pinto FN, et al (2010) Taking root: Enduring effect of rhizosphere bacterial  
355 colonization in mangroves. PLoS One 5:1–10. <https://doi.org/10.1371/journal.pone.0014065>
- 356 2. Dias ACF, Dini-Andreote F, Taketani RG, et al (2011) Archaeal communities in the sediments of three  
357 contrasting mangroves. J Soils Sediments 11:1466–1476. <https://doi.org/10.1007/s11368-011-0423-7>
- 358 3. Pupin B, Nahas E (2014) Microbial populations and activities of mangrove, restinga and Atlantic forest soils  
359 from Cardoso Island, Brazil. J Appl Microbiol 116:851–864. <https://doi.org/10.1111/jam.12413>
- 360 4. Shiao YJ, Cai Y, Lin Y Te, et al (2018) Community Structure of Active Aerobic Methanotrophs in Red



- 361 Mangrove (*Kandelia obovata*) Soils Under Different Frequency of Tides. *Microb Ecol* 75:761–770.  
362 <https://doi.org/10.1007/s00248-017-1080-1>
- 363 5. Hanson RS, Hanson TE (1996) Methanotrophic bacteria. *Microbiol Rev* 60:439–71
- 364 6. Rastogi G, Ranade DR, Yeole TY, et al (2009) Novel methanotroph diversity evidenced by molecular  
365 characterization of particulate methane monooxygenase A (pmoA) genes in a biogas reactor. *Microbiol Res*  
366 164:536–544. <https://doi.org/10.1016/j.micres.2007.05.004>
- 367 7. Dai Z, Trettin CC, Froelking S, Birdsey RA (2018) Mangrove carbon assessment tool: Model development  
368 and sensitivity analysis. *Estuar Coast Shelf Sci* 208:23–35. <https://doi.org/10.1016/j.ecss.2018.04.035>
- 369 8. Chowdhury TR, Dick RP (2013) Ecology of aerobic methanotrophs in controlling methane fluxes from  
370 wetlands. *Appl Soil Ecol* 65:8–22. <https://doi.org/10.1016/j.apsoil.2012.12.014>
- 371 9. Oliver JP, Schilling JS (2018) Harnessing fungi to mitigate CH<sub>4</sub> in natural and engineered systems. *Appl*  
372 *Microbiol Biotechnol* 102:7365–7375. <https://doi.org/10.1007/s00253-018-9203-2>
- 373 10. Wise MG, McArthur JV, Shinkets LJ (1999) Methanotroph diversity in landfill soil: Isolation of novel type  
374 I and type II methanotrophs whose presence was suggested by culture-independent 16S ribosomal DNA  
375 analysis. *Appl Environ Microbiol* 65:4887–4897. <https://doi.org/10.1128/aem.65.11.4887-4897.1999>
- 376 11. Kwon M, Ho A, Yoon S (2019) Novel approaches and reasons to isolate methanotrophic bacteria with  
377 biotechnological potentials: recent achievements and perspectives. *Appl Microbiol Biotechnol* 103:1–8.  
378 <https://doi.org/10.1007/s00253-018-9435-1>
- 379 12. Costa RB, Okada DY, Martins TH, Foresti E (2018) Aerobic methanotrophs grew under anoxic conditions  
380 and supported a diverse heterotrophic bacterial community. *Environ Eng Sci* 35:804–814.  
381 <https://doi.org/10.1089/ees.2017.0346>
- 382 13. Knief C (2019) Diversity of Methane Cycling Microorganisms in Soils and Their Relation to Oxygen
- 383 14. Op den Camp HJM, Islam T, Stott MB, et al (2009) Environmental, genomic and taxonomic perspectives on  
384 methanotrophic Verrucomicrobia. *Environ Microbiol Rep* 1:293–306. <https://doi.org/10.1111/j.1758-2229.2009.00022.x>
- 386 15. Schaeffer-Novelli Y, Soriano-Sierra EJ, Câmara Do Vale C, et al (2016) Climate changes in mangrove  
387 forests and salt marshes. *BRAZILIAN J Oceanogr* 64:37–52. <https://doi.org/10.1590/S1679-875920160919064sp2>
- 389 16. Andreote FD, Jiménez DJ, Chaves D, et al (2012) The microbiome of Brazilian mangrove sediments as  
390 revealed by metagenomics. *PLoS One* 7:. <https://doi.org/10.1371/journal.pone.0038600>
- 391 17. Cotta SR, Cadete LL, van Elsas JD, et al (2019) Exploring bacterial functionality in mangrove sediments  
392 and its capability to overcome anthropogenic activity. *Mar Pollut Bull* 141:586–594.  
393 <https://doi.org/10.1016/j.marpolbul.2019.03.001>
- 394 18. Taketani RG, Franco NO, Rosado AS, van Elsas JD (2010) Microbial community response to a simulated  
395 hydrocarbon spill in mangrove sediments. *J Microbiol* 48:7–15. <https://doi.org/10.1007/s12275-009-0147-1>
- 396 19. Whiteley AS, Thomson B, Lueders T, Manefield M (2007) RNA stable-isotope probing. *Nat Protoc* 2:838–  
397 844. <https://doi.org/10.1038/nprot.2007.115>
- 398 20. Neufeld JD, Vohra J, Dumont MG, et al (2007) PROTOCOL DNA stable-isotope probing. *Analysis* 2:860–  
399 866. <https://doi.org/10.1038/nprot.2007.109>
- 400 21. Øvreås L, Forney L, Daae FL, Torsvik V (1997) Distribution of bacterioplankton in meromictic lake  
401 Saelenvannet, as determined by denaturing gradient gel electrophoresis of PCR-amplified gene fragments  
402 coding for 16S rRNA. *Appl Environ Microbiol* 63:3367–3373. <https://doi.org/10.1128/aem.63.9.3367-3373.1997>
- 404 22. Macek M, Mercier B, Macková A, et al (1997) Sensitivity of the denaturing gradient gel electrophoresis  
405 technique in detection of known mutations and novel Asian mutations in the CFTR gene. *Hum Mutat* 9:136–  
406 147. [https://doi.org/10.1002/\(SICI\)1098-1004\(1997\)9:2<136::AID-HUMU6>3.0.CO;2-7](https://doi.org/10.1002/(SICI)1098-1004(1997)9:2<136::AID-HUMU6>3.0.CO;2-7)
- 407 23. Lane DJ (1991) 16S/23S rRNA sequencing. *Nucleic acid Tech Bact Syst* 115–175

- 408 24. Nübel U, Engelen B, Felsre A, et al (1996) Sequence heterogeneities of genes encoding 16S rRNAs in  
409 *Paenibacillus polymyxa* detected by temperature gradient gel electrophoresis. *J Bacteriol* 178:5636–5643.  
410 <https://doi.org/10.1128/jb.178.19.5636-5643.1996>
- 411 25. Huber T, Faulkner G, Hugenholtz P (2004) Bellerophon: A program to detect chimeric sequences in  
412 multiple sequence alignments. *Bioinformatics* 20:2317–2319. <https://doi.org/10.1093/bioinformatics/bth226>
- 413 26. Schloss PD, Westcott SL, Ryabin T, et al (2009) Introducing mothur: Open-source, platform-independent,  
414 community-supported software for describing and comparing microbial communities. *Appl Environ*  
415 *Microbiol* 75:7537–7541. <https://doi.org/10.1128/AEM.01541-09>
- 416 27. Pruesse E, Quast C, Knittel K, et al (2007) E. Pruesse - SILVA: a comprehensive online resource for quality  
417 checked and aligned ribosomal RNA sequence data compatible with ARB. In: *Nucleic Acids Res.*  
418 <https://kopernio.com/viewer?doi=10.1093/nar/gkm864&route=6>. Accessed 21 Jun 2020
- 419 28. Ludwig W, Strunk O, Westram R, et al (2004) ARB: A software environment for sequence data. *Nucleic*  
420 *Acids Res* 32:1363–1371. <https://doi.org/10.1093/nar/gkh293>
- 421 29. Benson DA, Karsch-Mizrachi I, Lipman DJ, et al (2005) GenBank. *Nucleic Acids Res* 33:34–38.  
422 <https://doi.org/10.1093/nar/gki063>
- 423 30. Cole JR, Wang Q, Cardenas E, et al (2009) The Ribosomal Database Project: Improved alignments and new  
424 tools for rRNA analysis. *Nucleic Acids Res* 37:141–145. <https://doi.org/10.1093/nar/gkn879>
- 425 31. Thompson JD, Gibson TJ, Plewniak F, et al (1997) The CLUSTAL X windows interface: Flexible strategies  
426 for multiple sequence alignment aided by quality analysis tools. *Nucleic Acids Res* 25:4876–4882.  
427 <https://doi.org/10.1093/nar/25.24.4876>
- 428 32. Hall TA (1999) The green synthesis of ultrafine palladium-phosphorus alloyed nanoparticles anchored on  
429 polydopamine functionalized graphene used as an excellent electrocatalyst for ethanol oxidation. *Nucleic*  
430 *Acids Symp.* 41:95–98
- 431 33. Kumar S, Stecher G, Tamura K (2016) MEGA7: Molecular Evolutionary Genetics Analysis Version 7.0 for  
432 Bigger Datasets. *Mol Biol Evol* 33:1870–1874. <https://doi.org/10.1093/molbev/msw054>
- 433 34. Henckel T, Jäckel U, Schnell S, Conrad R (2000) Molecular analyses of novel methanotrophic communities  
434 in forest soil that oxidize atmospheric methane. *Appl Environ Microbiol* 66:1801–1808.  
435 <https://doi.org/10.1128/AEM.66.5.1801-1808.2000>
- 436 35. Ettwig KF, Butler MK, Le Paslier D, et al (2010) Nitrite-driven anaerobic methane oxidation by oxygenic  
437 bacteria. *Nature* 464:543–548. <https://doi.org/10.1038/nature08883>
- 438 36. Luesken FA, Van Alen TA, Van Der Biezen E, et al (2011) Diversity and enrichment of nitrite-dependent  
439 anaerobic methane oxidizing bacteria from wastewater sludge. *Appl Microbiol Biotechnol* 92:845–854.  
440 <https://doi.org/10.1007/s00253-011-3361-9>
- 441 37. Lee EY (2019) Methanotrophs: microbiology fundamentals and biotechnological applications
- 442 38. Chistoserdova L (2015) Methylophils in natural habitats: current insights through metagenomics. *Appl*  
443 *Microbiol Biotechnol* 99:5763–5779. <https://doi.org/10.1007/s00253-015-6713-z>
- 444 39. Rivers AR, Sharma S, Tringe SG, et al (2013) Transcriptional response of bathypelagic marine  
445 bacterioplankton to the Deepwater Horizon oil spill. *ISME J* 7:2315–2329.  
446 <https://doi.org/10.1038/ismej.2013.129>
- 447 40. Lüke C, Krause S, Cavigiolo S, et al (2010) Biogeography of wetland rice methanotrophs. *Environ*  
448 *Microbiol* 12:862–872. <https://doi.org/10.1111/j.1462-2920.2009.02131.x>
- 449 41. Pol A, Heijmans K, Harhangi HR, et al (2007) Methanotrophy below pH 1 by a new Verrucomicrobia  
450 species. *Nature* 450:874–878. <https://doi.org/10.1038/nature06222>
- 451 42. Stoecker K, Bendinger B, Schöning B, et al (2006) Cohn's Crenothrix is a filamentous methane oxidizer  
452 with an unusual methane monooxygenase. *Proc Natl Acad Sci U S A* 103:2363–2367.  
453 <https://doi.org/10.1073/pnas.0506361103>
- 454 43. Cébron A, Bodrossy L, Stralis-Pavese N, et al (2007) Nutrient amendments in soil DNA stable isotope

- 455            probing experiments reduce the observed methanotroph diversity. *Appl Environ Microbiol* 73:798–807.  
456            <https://doi.org/10.1128/AEM.01491-06>
- 457    44.    Cébron A, Bodrossy L, Chen Y, et al (2007) Identity of active methanotrophs in landfill cover soil as  
458            revealed by DNA-stable isotope probing. *FEMS Microbiol Ecol* 62:12–23. [https://doi.org/10.1111/j.1574-](https://doi.org/10.1111/j.1574-6941.2007.00368.x)  
459            [6941.2007.00368.x](https://doi.org/10.1111/j.1574-6941.2007.00368.x)
- 460    45.    Mcdonald IR, Radajewski S, Murrell JC (2005) Stable isotope probing of nucleic acids in methanotrophs  
461            and methylotrophs : A review. *Org Geochem* 36:779–787.  
462            <https://doi.org/10.1016/j.orggeochem.2005.01.005>
- 463    46.    Morris SA, Radajewski S, Willison TW, Murrell JC (2002) Identification of the functionally active  
464            methanotroph population in a peat soil microcosm by stable-isotope probing. *Appl Environ Microbiol*  
465            68:1446–1453. <https://doi.org/10.1128/AEM.68.3.1446-1453.2002>
- 466    47.    Radajewski S, Webster G, Reay DS, et al (2002) Identification of active methylotroph populations in an  
467            acidic forest soil by stable-isotope probing. *Microbiology* 148:2331–2342.  
468            <https://doi.org/10.1099/00221287-148-8-2331>
- 469    48.    Beck DAC, Kalyuzhnaya MG, Malfatti S, et al (2013) A metagenomic insight into freshwater methane-  
470            utilizing communities and evidence for cooperation between the Methylococcaceae and the  
471            Methylophilaceae. *PeerJ* 2013:1–23. <https://doi.org/10.7717/peerj.23>
- 472    49.    Chen R, Luo YH, Chen JX, et al (2016) Evolution of the microbial community of the biofilm in a methane-  
473            based membrane biofilm reactor reducing multiple electron acceptors. *Environ Sci Pollut Res* 23:9540–  
474            9548. <https://doi.org/10.1007/s11356-016-6146-y>
- 475

## FIGURES

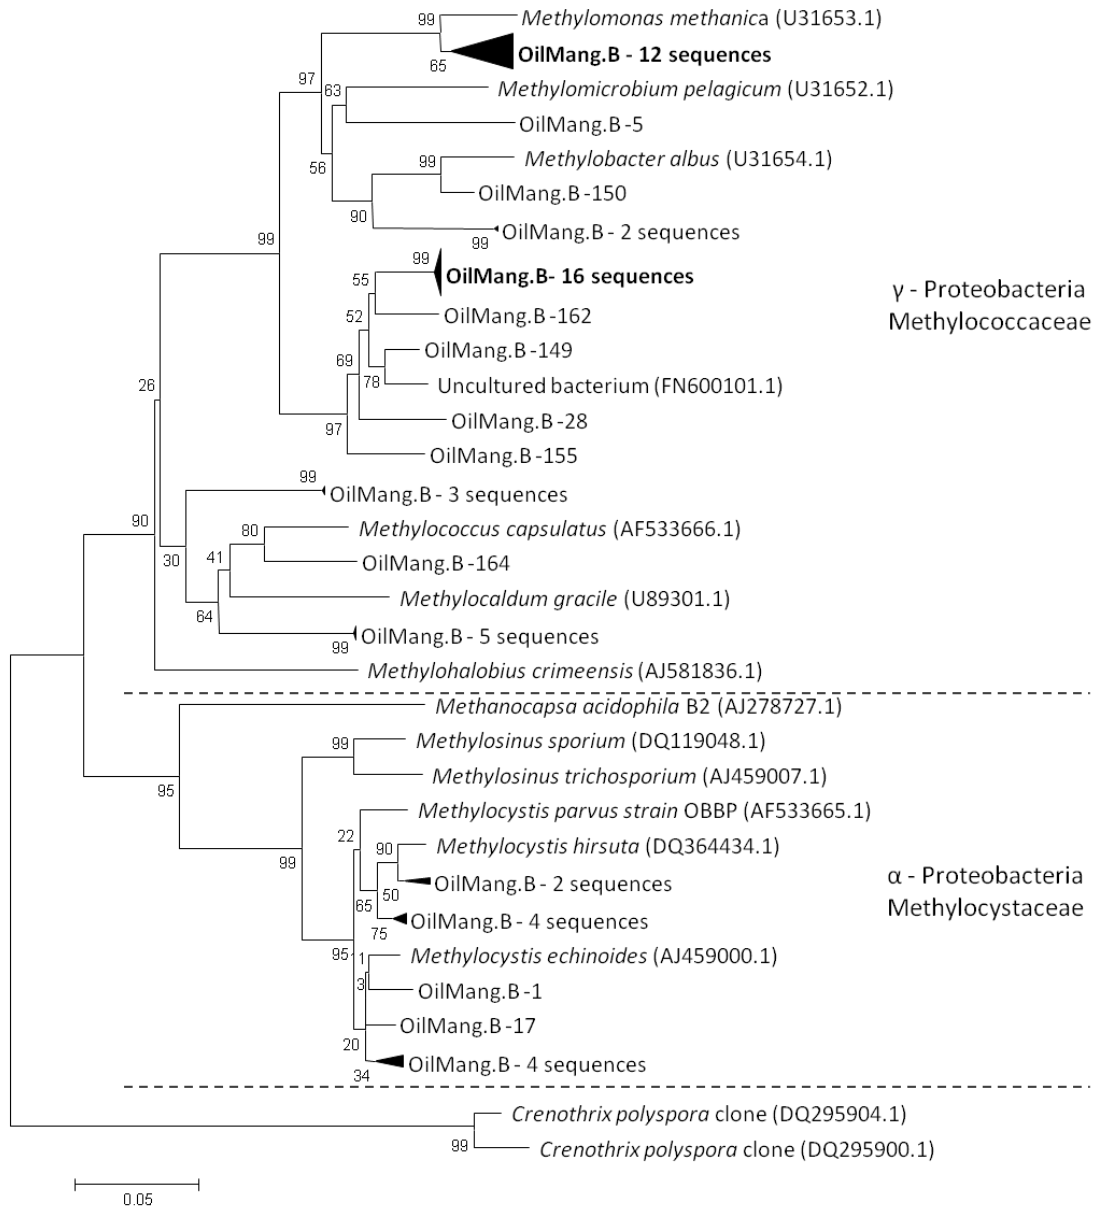

**Fig. 1** Phylogenetic neighbour-joining tree of *pmoA* gene sequences from clone library constructed from sediment of Bertioga's mangrove, at oil impacted site (OilMang.B). Reference strains and clones sequences were taken from GenBank and are named by their accession numbers. Bootstrap values derived from 2000 replicates are shown and were obtained using a distance matrix program neighbour-joining method within MEGA 7.0. The bar represents 5% sequence divergence.

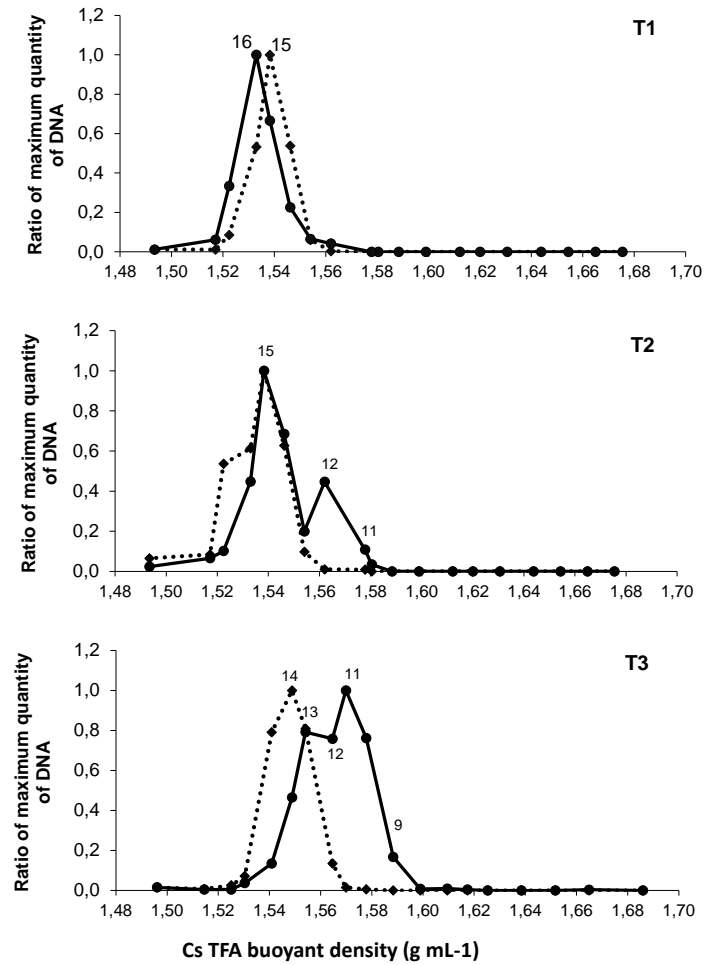

**Fig. 2** Quantitative distribution of DNA across the entire range of buoyant density (BD) of the DNA-SIP fractions from sediment microcosms incubated with <sup>12</sup>CH<sub>4</sub> (<sup>12</sup>C-DNA dotted line), and <sup>13</sup>CH<sub>4</sub> (<sup>13</sup>C-DNA solid line) for 2, 4 and 7 days of incubation (T1, T2 and T3, respectively). The numbers in the plot represent the fractions of prominence.

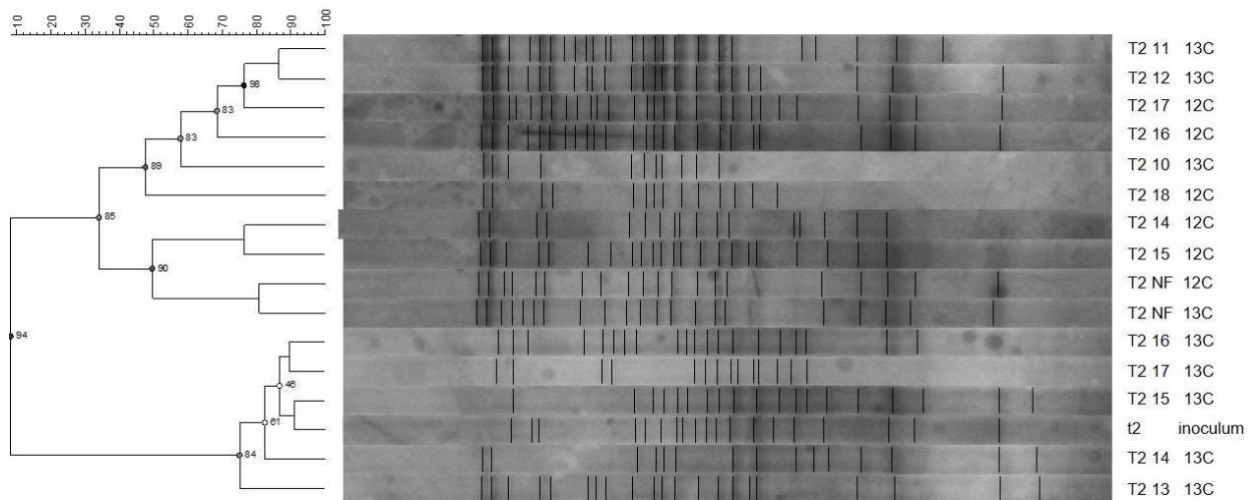

**Fig. 3** Cluster analysis of 16S rDNA DGGE fingerprint of fractionated DNA recovered from <sup>12</sup>CH<sub>4</sub> and <sup>13</sup>CH<sub>4</sub> microcosms from mangrove samples (Bertioga, São Paulo State, Brazil), at the 4th day of incubation (T2). The denaturing gradient ranged from 45% to 65%. Cluster analysis was performed with the Bionumerics software (Applied Maths, NV), using UPGMA method and Pearson coefficient. Cophenetic correlation values are shown in the nodes. Labels in each lane indicate: incubation time (T2 = 4 days); number of recovered fractions after SIP-DNA experiment and isopycnic centrifugation; enrichment carbon source (12C = <sup>12</sup>CH<sub>4</sub> or 13C = <sup>13</sup>CH<sub>4</sub>). t2, inoculum; NF, non-fractionated.

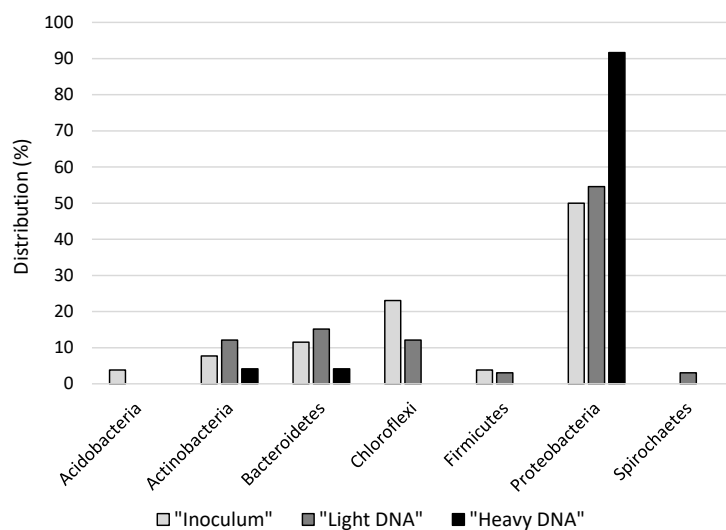

**Fig. 4** Phylum distribution detected by 16S RNA clone library from mangrove sediment (inoculum) and from light and heavy fractions derived from DNA-SIP experiment of microcosms enriched with methane ( $^{13}\text{CH}_4$ ).
